# Supplementary material for: Aerosolized miR-138-5p and miR-200c targets PD-L1 for lung cancer prevention
Source: PubMed Central journal article supplement (PMC10372486; doi:10.3389/fimmu.2023.1166951), 2023-07-13
Supplement: Table_1.pdf [file Table_1.pdf]

## Table s1

**Table s1: The antibodies used for IMC**

| Marker        | Metal |
|---------------|-------|
| CD206         | Nd143 |
| Ly6G          | Nd145 |
| $\alpha$ -SMA | Sm147 |
| CD11c         | Sm149 |
| Foxp3         | Gd160 |
| CD8a          | Dy162 |
| PD-L1         | Dy164 |
| B220          | Er170 |
| CD4           | Yb174 |
| F4/80         | Yb176 |
| DNA           | Ir191 |
