# Supplementary material for: Aerosolized miR-138-5p and miR-200c targets PD-L1 for lung cancer prevention
Source: PubMed Central journal article supplement (PMC10372486; doi:10.3389/fimmu.2023.1166951), 2023-07-13
Supplement: Table_2.pdf [file Table_2.pdf]

**Table s2: Detailed ROI analysis information for IMC results in Figure 3**

| ROI Name       | Group   | Total ROI Area (mm2) | Total Cell Number | Tumor Area (mm2) | Cell Number in Tumor Area |
|----------------|---------|----------------------|-------------------|------------------|---------------------------|
| VC_001         | Ctrl    | 0.490                | 7452              | 0.1262           | 1959                      |
| VC_002         | Ctrl    | 0.48                 | 7464              | 0.0814           | 1178                      |
| VC_003         | Ctrl    | 0.49                 | 7082              | 0.1444           | 2198                      |
| VC_004         | Ctrl    | 0.49                 | 7397              | 0.0766           | 1256                      |
| VC_005         | Ctrl    | 0.50                 | 7496              | 0.0685           | 1216                      |
| 138_07_001     | miR-138 | 0.49                 | 5918              | 0.0795           | 881                       |
| 138_07_002     | miR-138 | 0.49                 | 7063              | 0.1302           | 2060                      |
| 138_07_003     | miR-138 | 0.49                 | 6321              | 0.1450           | 1879                      |
| 138_07_004     | miR-138 | 0.49                 | 5899              | 0.0282           | 334                       |
| 200_03_001     | miR-200 | 0.49                 | 6228              | 0.0872           | 1046                      |
| 200_03_003     | miR-200 | 0.49                 | 6748              | 0.0738           | 1060                      |
| 200_03_004     | miR-200 | 0.49                 | 6468              | 0.0683           | 985                       |
| 200_03_005     | miR-200 | 0.49                 | 6616              | 0.0902           | 1168                      |
| 200_03_006     | miR-200 | 0.49                 | 6429              | 0.0520           | 615                       |
| 138_200_01_001 | Combo   | 0.49                 | 7341              | 0.1560           | 2544                      |
| 138_200_01_002 | Combo   | 0.49                 | 7278              | 0.0924           | 1490                      |
| 138_200_01_003 | Combo   | 0.49                 | 7057              | 0.0612           | 990                       |
| 138_200_01_004 | Combo   | 0.49                 | 7589              | 0.1038           | 1726                      |
| 138_200_01_005 | Combo   | 0.49                 | 6949              | 0.1093           | 1596                      |
